# Supplementary material for: Characteristics of Individuals with Moderate-to-Severe Traumatic Brain Injury and Predictors of Specialized Rehabilitation: A Retrospective Cohort Study
Source: Research Square preprint supplement (doi:10.21203/rs.3.rs-2101976/v1), 2023-01-06
Supplement: Supplementary file 1 [file 5b59bd666e12254c18bd510f.xlsx]

## Sheet: Table S1
Table S1. Characteristics of individuals with moderate-to-severe TBI discharged to rehabilitation within 365 days (FY 2010-2017)
		2010/11	2011/12	2012/13	2013/14	2014/15	2015/16	2016/17	2017/18	Total	P-value
		N=447	N=508	N=540	N=625	N=629	N=659	N=695	N=645	N=4748
Demographic Characteristics
Mean age (± SD)		61.99 ± 21.65	64.12 ± 20.83	63.86 ± 21.54	63.92 ± 20.22	65.29 ± 21.22	66.68 ± 20.82	65.79 ± 19.70	66.79 ± 20.63	64.98 ± 20.81	0.001
Age group N(%N)	16 to 45	108 (24.2%)	94 (18.5%)	108 (20.0%)	113 (18.1%)	125 (19.9%)	120 (18.2%)	116 (16.7%)	107 (16.6%)	891 (18.8%)	0.003
	46 to 64	97 (21.7%)	120 (23.6%)	121 (22.4%)	161 (25.8%)	118 (18.8%)	126 (19.1%)	161 (23.2%)	141 (21.9%)	1045 (22.0%)
	65 to 80	131 (29.3%)	159 (31.3%)	166 (30.7%)	203 (32.5%)	200 (31.8%)	199 (30.2%)	239 (34.4%)	188 (29.1%)	1485 (31.3%)
	81+	111 (24.8%)	135 (26.6%)	145 (26.9%)	148 (23.7%)	186 (29.6%)	214 (32.5%)	179 (25.8%)	209 (32.4%)	1327 (27.9%)
Sex N(%N)	Female	158 (35.3%)	172 (33.9%)	184 (34.1%)	222 (35.5%)	219 (34.8%)	226 (34.3%)	232 (33.4%)	220 (34.1%)	1633 (34.4%)	0.995
	Male	289 (64.7%)	336 (66.1%)	356 (65.9%)	403 (64.5%)	410 (65.2%)	433 (65.7%)	463 (66.6%)	425 (65.9%)	3115 (65.6%)
Rural N(%N)	Missing	0 (0.0%)	*1 - 5	0 (0.0%)	*1 - 5	*1 - 5	*1 - 5	*1 - 5	*1 - 5	13 (0.3%)	0.246
	No	403 (90.2%)	454 (89.4%)	489 (90.6%)	543 (86.9%)	576 (91.6%)	600 (91.0%)	636 (91.5%)	585 (90.7%)	4286 (90.3%)
	Yes	44 (9.8%)	*49 - 53	51 (9.4%)	*77 - 81	*48 - 52	*54 - 58	*54 - 58	*55 - 59	449 (9.5%)
Presence of mental health condition at TBI hospitalization N(%N)		60 (13.4%)	77 (15.2%)	76 (14.1%)	97 (15.5%)	89 (14.1%)	81 (12.3%)	87 (12.5%)	92 (14.3%)	659 (13.9%)	0.686
Clinical Characteristics
Cause of injury N(%N)	Pedestrian struck	18 (4.0%)	32 (6.3%)	31 (5.7%)	42 (6.7%)	43 (6.8%)	36 (5.5%)	44 (6.3%)	49 (7.6%)	295 (6.2%)	0.394
	Fall	300 (67.1%)	346 (68.1%)	354 (65.6%)	394 (63.0%)	411 (65.3%)	368 (55.8%)	392 (56.4%)	366 (56.7%)	2931 (61.7%)	<.001
	Sport-related	0 (0.0%)	0 (0.0%)	*1 - 5	0 (0.0%)	*1 - 5	*1 - 5	*1 - 5	0 (0.0%)	*1 - 5	0.825
	Motor vehicle related	64 (14.3%)	68 (13.4%)	75 (13.9%)	82 (13.1%)	71 (11.3%)	100 (15.2%)	95 (13.7%)	90 (14.0%)	645 (13.6%)	0.696
	Other	94 (21.0%)	114 (22.4%)	133 (24.6%)	166 (26.6%)	149 (23.7%)	143 (21.7%)	153 (22.0%)	134 (20.8%)	1086 (22.9%)	0.23
	Other uncategorized	15 (3.4%)	16 (3.1%)	16 (3.0%)	23 (3.7%)	16 (2.5%)	83 (12.6%)	87 (12.5%)	69 (10.7%)	325 (6.8%)	<.001
Acute care discharge disposition N(%N)	Other acute	72 (16.1%)	75 (14.8%)	70 (13.0%)	78 (12.5%)	85 (13.5%)	85 (12.9%)	85 (12.2%)	77 (11.9%)	627 (13.2%)	0.136
	Direct rehab	289 (64.7%)	356 (70.1%)	382 (70.7%)	456 (73.0%)	463 (73.6%)	484 (73.4%)	500 (71.9%)	492 (76.3%)	3422 (72.1%)
	Home/signed out	61 (13.6%)	56 (11.0%)	67 (12.4%)	73 (11.7%)	57 (9.1%)	73 (11.1%)	84 (12.1%)	56 (8.7%)	527 (11.1%)
	Long-term care	*20 - 24	*16 - 20	*16 - 20	*13 - 17	*19 - 23	*12 - 16	*21 - 25	*15 - 19	157 (3.3%)
	Other	*1 - 5	*1 - 5	*1 - 5	*1 - 5	*1 - 5	*1 - 5	*1 - 5	*1 - 5	15 (0.3%)
Acute care length of stay (LOS) mean ± SD		16.09 ± 16.77	18.74 ± 18.86	17.15 ± 19.26	15.93 ± 16.01	15.63 ± 17.43	14.34 ± 13.81	14.84 ± 17.01	14.84 ± 16.27	15.82 ± 16.93	<.001
Alternative level of care (ALC) LOS mean ± SD		4.98 ± 9.52	6.12 ± 15.58	4.50 ± 9.30	3.53 ± 7.31	3.61 ± 11.13	4.49 ± 14.41	4.36 ± 10.72	4.64 ± 12.80	4.47 ± 11.66	0.009
Total LOS mean ± SD		21.07 ± 21.47	24.86 ± 27.40	21.66 ± 22.97	19.47 ± 19.55	19.24 ± 23.23	18.83 ± 21.73	19.19 ± 22.31	19.48 ± 23.06	20.29 ± 22.78	<.001
Rehabilitation LOS mean ± SD		39.58 ± 57.84	34.27 ± 32.45	34.35 ± 29.03	35.36 ± 35.29	33.67 ± 34.73	32.09 ± 26.96	32.31 ± 32.24	28.70 ± 20.87	33.54 ± 34.24	<.001
Rehabilitation ALC days mean ± SD		3.86 ± 48.20	1.69 ± 13.23	2.41 ± 14.31	2.12 ± 17.99	1.72 ± 9.02	2.94 ± 15.14	3.07 ± 19.15	1.49 ± 8.94	2.39 ± 20.38	0.567
Rehabilitation discharge disposition N(%N)	Home without services	147 (32.9%)	163 (32.1%)	183 (33.9%)	196 (31.4%)	171 (27.2%)	194 (29.4%)	199 (28.6%)	172 (26.7%)	1425 (30.0%)	0.004
	Home with services	159 (35.6%)	185 (36.4%)	182 (33.7%)	244 (39.0%)	261 (41.5%)	254 (38.5%)	299 (43.0%)	257 (39.8%)	1841 (38.8%)
	Other community	47 (10.5%)	48 (9.4%)	51 (9.4%)	51 (8.2%)	63 (10.0%)	66 (10.0%)	56 (8.1%)	58 (9.0%)	440 (9.3%)
	LTC facility	29 (6.5%)	33 (6.5%)	30 (5.6%)	29 (4.6%)	27 (4.3%)	40 (6.1%)	31 (4.5%)	24 (3.7%)	243 (5.1%)
	Acute care	36 (8.1%)	36 (7.1%)	45 (8.3%)	50 (8.0%)	45 (7.2%)	51 (7.7%)	37 (5.3%)	42 (6.5%)	342 (7.2%)
	Expired	*1 - 5	*1 - 5	0 (0.0%)	*2 - 6	*1 - 5	6 (0.9%)	*1 - 5	*1 - 5	25 (0.5%)
	Unknown	*24 - 28	*38 - 42	49 (9.1%)	*49 - 53	*57 - 61	48 (7.3%)	*68 - 72	*87 - 91	432 (9.1%)
Wait time** mean ± SD		41.25 ± 53.64	40.74 ± 50.06	39.01 ± 53.63	40.22 ± 59.81	36.66 ± 55.29	36.17 ± 52.45	35.77 ± 51.87	30.76 ± 41.63	37.26 ± 52.53	0.011
>1 rehabilitation stay within 365 days N(%N)		49 (11.0%)	54 (10.6%)	59 (10.9%)	51 (8.2%)	79 (12.6%)	52 (7.9%)	80 (11.5%)	47 (7.3%)	471 (9.9%)	0.01
Outcome Measures (mean ± SD)
Admission FIM		80.10 ± 24.41	79.76 ± 24.11	78.86 ± 25.62	76.00 ± 23.73	74.53 ± 22.68	74.00 ± 21.77	74.57 ± 21.65	73.79 ± 21.54	76.14 ± 23.19	<.001
Discharge FIM		101.64 ± 22.98	102.31 ± 21.09	101.34 ± 24.18	101.62 ± 22.11	100.40 ± 22.12	99.60 ± 21.80	100.34 ± 21.82	100.35 ± 21.15	100.87 ± 22.13	0.503
Change in FIM		21.18 ± 19.40	21.61 ± 15.99	22.24 ± 18.53	25.11 ± 17.92	25.25 ± 16.60	25.23 ± 16.10	24.91 ± 17.20	25.93 ± 14.73	24.14 ± 17.11	<.001
FIM efficiency		0.74 ± 0.94	0.87 ± 0.91	0.88 ± 0.94	0.93 ± 0.91	0.99 ± 0.82	1.00 ± 1.16	1.06 ± 1.15	1.13 ± 0.87	0.96 ± 0.98	<.001
Cognitive FIM (admission)		24.32 ± 7.47	24.27 ± 7.34	24.33 ± 7.53	23.19 ± 6.97	23.32 ± 7.10	23.46 ± 6.80	23.79 ± 6.92	23.43 ± 6.69	23.72 ± 7.08	0.014
Cognitive FIM (discharge)		27.65 ± 6.45	27.57 ± 5.98	27.25 ± 6.83	27.26 ± 6.10	26.86 ± 6.45	26.86 ± 6.29	27.15 ± 6.35	27.12 ± 6.06	27.19 ± 6.32	0.398
Change in cognitive FIM		3.20 ± 5.27	2.99 ± 4.40	3.01 ± 4.59	3.92 ± 5.16	3.40 ± 4.68	3.24 ± 4.47	3.06 ± 4.62	3.49 ± 4.20	3.30 ± 4.68	0.015
Motor FIM (admission)		55.78 ± 20.99	55.49 ± 20.69	54.53 ± 21.70	52.81 ± 20.49	51.22 ± 19.37	50.54 ± 19.15	50.78 ± 18.84	50.36 ± 19.15	52.42 ± 20.05	<.001
Motor FIM (discharge)		73.99 ± 18.95	74.74 ± 17.42	74.09 ± 19.40	74.36 ± 18.14	73.53 ± 17.86	72.74 ± 18.03	73.19 ± 17.82	73.23 ± 17.30	73.68 ± 18.08	0.622
Change in motor FIM		17.97 ± 16.57	18.61 ± 13.88	19.23 ± 16.45	21.18 ± 15.33	21.84 ± 14.52	22.00 ± 14.22	21.85 ± 14.99	22.45 ± 13.24	20.84 ± 14.95	<.001
*suppressed due to small cell sizes
**from date of first admission to hospital for TBI (i.e. first admission within the episode of care) to date of rehab admission

## Sheet: Table S2
Table S2. Characteristics of individuals with TBI incident cases (FY 2010-2017)
		2010/11	2011/12	2012/13	2013/14	2014/15	2015/16	2016/17	2017/18	Total	P-value
		N=4066	N=4308	N=4452	N=4656	N=4632	N=5004	N=5094	N=5132	N=37344
Demographic Characteristics
Mean age (± SD)		60.67 ± 23.41	61.86 ± 22.87	62.11 ± 22.89	63.65 ± 22.06	64.52 ± 22.11	64.69 ± 22.30	65.40 ± 21.72	65.84 ± 21.93	63.72 ± 22.44	<.001
Age group, N(%N)	16 to 45	1090 (26.8%)	1062 (24.7%)	1105 (24.8%)	1003 (21.5%)	988 (21.3%)	1070 (21.4%)	997 (19.6%)	1012 (19.7%)	8327 (22.3%)	<.001
	46 to 64	889 (21.9%)	970 (22.5%)	955 (21.5%)	1023 (22.0%)	931 (20.1%)	1020 (20.4%)	1000 (19.6%)	980 (19.1%)	7768 (20.8%)
	65 to 80	1038 (25.5%)	1111 (25.8%)	1153 (25.9%)	1292 (27.7%)	1327 (28.6%)	1352 (27.0%)	1554 (30.5%)	1482 (28.9%)	10309 (27.6%)
	81+	1049 (25.8%)	1165 (27.0%)	1239 (27.8%)	1338 (28.7%)	1386 (29.9%)	1562 (31.2%)	1543 (30.3%)	1658 (32.3%)	10940 (29.3%)
Sex, N(%N)	Female	1469 (36.1%)	1567 (36.4%)	1640 (36.8%)	1793 (38.5%)	1781 (38.4%)	1984 (39.6%)	1862 (36.6%)	1960 (38.2%)	14056 (37.6%)	0.002
	Male	2597 (63.9%)	2741 (63.6%)	2812 (63.2%)	2863 (61.5%)	2851 (61.6%)	3020 (60.4%)	3232 (63.4%)	3172 (61.8%)	23288 (62.4%)
Rural, N(%N)	Missing	*1 - 5	*1 - 5	*1 - 5	*4 - 8	24 (0.5%)	14 (0.3%)	19 (0.4%)	21 (0.4%)	87 (0.2%)	<.001
	No	3537 (87.0%)	3760 (87.3%)	3897 (87.5%)	4083 (87.7%)	4075 (88.0%)	4438 (88.7%)	4531 (88.9%)	4530 (88.3%)	32851 (88.0%)
	Yes	*524 - 528	*543 - 547	*550 - 554	*565 - 569	533 (11.5%)	552 (11.0%)	544 (10.7%)	581 (11.3%)	4406 (11.8%)
TBI severity, N(%N)	Missing	25 (0.6%)	21 (0.5%)	28 (0.6%)	29 (0.6%)	33 (0.7%)	27 (0.5%)	51 (1.0%)	36 (0.7%)	250 (0.7%)	0.011
	Unknown	1081 (26.6%)	1156 (26.8%)	1125 (25.3%)	1162 (25.0%)	1127 (24.3%)	1265 (25.3%)	1316 (25.8%)	1279 (24.9%)	9511 (25.5%)
	Mild	283 (7.0%)	299 (6.9%)	322 (7.2%)	292 (6.3%)	316 (6.8%)	356 (7.1%)	298 (5.9%)	322 (6.3%)	2488 (6.7%)
	Moderate	195 (4.8%)	175 (4.1%)	218 (4.9%)	205 (4.4%)	206 (4.4%)	252 (5.0%)	257 (5.0%)	228 (4.4%)	1736 (4.6%)
	Severe	2482 (61.0%)	2657 (61.7%)	2759 (62.0%)	2968 (63.7%)	2950 (63.7%)	3104 (62.0%)	3172 (62.3%)	3267 (63.7%)	23359 (62.6%)
Presence of mental health condition at TBI hospitalization, N(%N)		450 (11.1%)	531 (12.3%)	502 (11.3%)	572 (12.3%)	521 (11.2%)	600 (12.0%)	572 (11.2%)	556 (10.8%)	4304 (11.5%)	0.152
Clinical Characteristics
Cause of injury, N(%N)	Pedestrian struck	137 (3.4%)	167 (3.9%)	169 (3.8%)	158 (3.4%)	194 (4.2%)	176 (3.5%)	188 (3.7%)	177 (3.4%)	1366 (3.7%)	0.394
	Fall	2574 (63.3%)	2767 (64.2%)	2889 (64.9%)	3119 (67.0%)	3107 (67.1%)	2712 (54.2%)	2843 (55.8%)	2910 (56.7%)	22921 (61.4%)	<.001
	Sport-related	46 (1.1%)	32 (0.7%)	33 (0.7%)	38 (0.8%)	31 (0.7%)	23 (0.5%)	24 (0.5%)	28 (0.5%)	255 (0.7%)	0.002
	Motor vehicle related	527 (13.0%)	500 (11.6%)	489 (11.0%)	490 (10.5%)	478 (10.3%)	574 (11.5%)	576 (11.3%)	559 (10.9%)	4193 (11.2%)	0.005
	Other	773 (19.0%)	881 (20.5%)	900 (20.2%)	890 (19.1%)	884 (19.1%)	971 (19.4%)	909 (17.8%)	918 (17.9%)	7126 (19.1%)	0.008
	Other uncategorized	202 (5.0%)	205 (4.8%)	194 (4.4%)	193 (4.1%)	194 (4.2%)	796 (15.9%)	832 (16.3%)	806 (15.7%)	3422 (9.2%)	<.001
Acute care discharge disposition, N(%N)	Other acute	302 (7.4%)	303 (7.0%)	294 (6.6%)	322 (6.9%)	334 (7.2%)	359 (7.2%)	322 (6.3%)	379 (7.4%)	2615 (7.0%)	<.001
	Died	540 (13.3%)	525 (12.2%)	503 (11.3%)	516 (11.1%)	531 (11.5%)	576 (11.5%)	626 (12.3%)	578 (11.3%)	4395 (11.8%)
	Direct rehab	399 (9.8%)	491 (11.4%)	539 (12.1%)	594 (12.8%)	628 (13.6%)	667 (13.3%)	680 (13.3%)	660 (12.9%)	4658 (12.5%)
	Home/signed out	2396 (58.9%)	2552 (59.2%)	2669 (60.0%)	2784 (59.8%)	2664 (57.5%)	2947 (58.9%)	2989 (58.7%)	2983 (58.1%)	21984 (58.9%)
	Long-term care	396 (9.7%)	408 (9.5%)	419 (9.4%)	408 (8.8%)	441 (9.5%)	426 (8.5%)	437 (8.6%)	478 (9.3%)	3413 (9.1%)
	Other	33 (0.8%)	29 (0.7%)	28 (0.6%)	32 (0.7%)	34 (0.7%)	29 (0.6%)	40 (0.8%)	54 (1.1%)	279 (0.7%)
Acute care length of stay (LOS), mean ± SD		8.41 ± 12.87	8.85 ± 13.46	8.78 ± 14.35	8.35 ± 14.18	8.53 ± 14.01	8.20 ± 11.92	8.66 ± 15.40	8.64 ± 14.21	8.55 ± 13.86	0.3
Alternate level of care (ALC) LOS, mean ± SD		3.44 ± 15.18	3.24 ± 15.80	2.60 ± 12.56	2.40 ± 11.82	3.07 ± 19.51	2.79 ± 15.82	3.52 ± 21.39	3.23 ± 22.95	3.04 ± 17.49	0.016
Total LOS, mean ± SD		11.85 ± 22.87	12.09 ± 23.99	11.39 ± 22.65	10.75 ± 20.49	11.60 ± 26.92	10.99 ± 22.25	12.17 ± 30.22	11.87 ± 29.10	11.59 ± 25.18	0.055
*suppressed due to small cell sizes
